# Supplementary material for: SHP-1 regulates hematopoietic stem cell quiescence by coordinating TGF-β signaling
Source: PubMed Central journal article supplement — J Exp Med. 2018 May 7;215(5):1337–47. doi: 10.1084/jem.20171477 (PMC5940262; doi:10.1084/jem.20171477), 2018-05-07
Supplement: JEM_20171477_sm.pdf [file JEM_20171477_sm.pdf]

Supplemental material

Jiang et al., <https://doi.org/10.1084/jem.20171477>

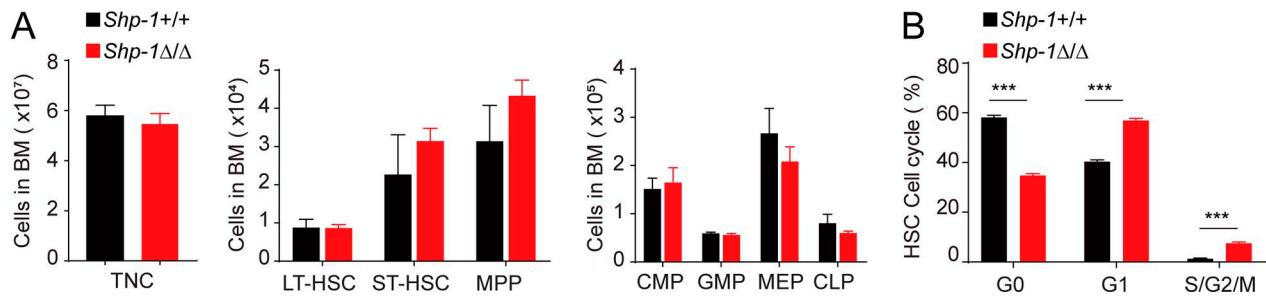

Figure S1. **Loss of *Shp-1* results in HSC activation in early time point.** (A) Total BM cell and comparison of LT-HSC, ST-HSC, MPP, and progenitor numbers in *Shp-1*<sup>+/+</sup> and *Shp-1*<sup>Δ/Δ</sup> mice at 1 wk after tamoxifen treatment (*n* = 4 mice). (B) Percentages of HSCs from *Shp-1*<sup>+/+</sup> and *Shp-1*<sup>Δ/Δ</sup> mice in each stage of the cell cycle (*n* = 4 mice). \*\*\*, *P* < 0.001. Error bars show mean ± SEM.

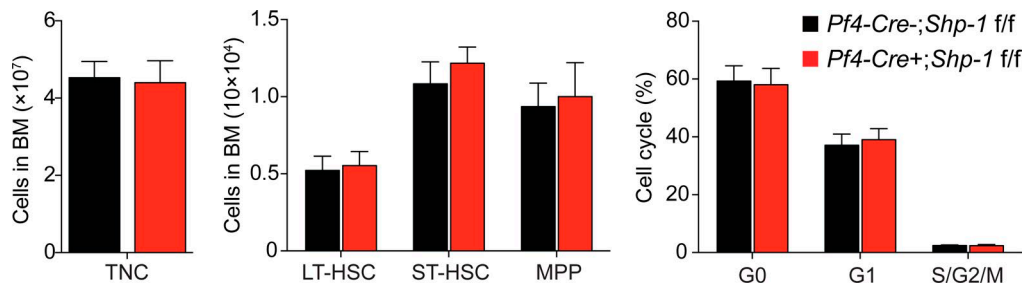

Figure S2. **The loss of *Shp-1* in MK niche does not compromise HSC quiescence.** Total BM cell and comparison of LT-HSC, ST-HSC, MPP, and HSC cycle in *Pf4-Cre*<sup>+</sup>; *Shp-1*<sup>fl/fl</sup> and *Pf4-Cre*<sup>-</sup>; *Shp-1*<sup>fl/fl</sup> mice (*n* = 4 mice).

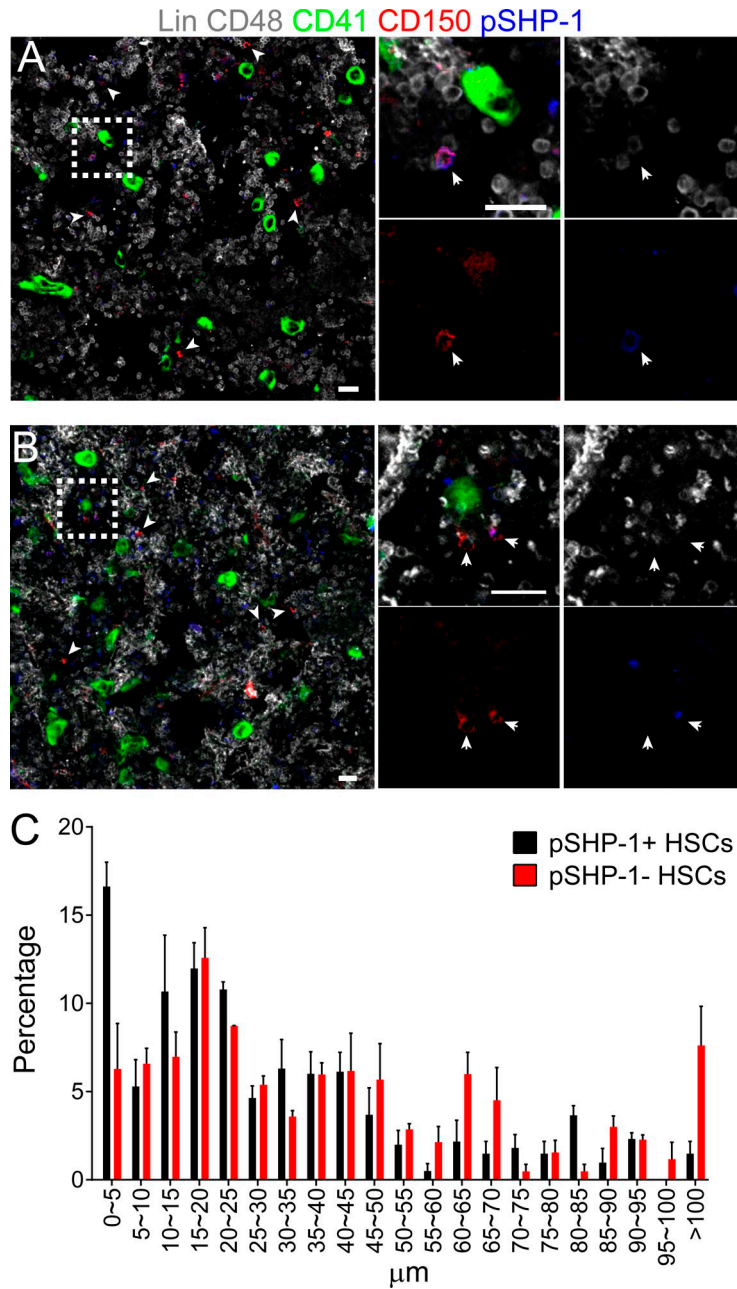

Figure S3. **The spatial relationship of pSHP-1<sup>+</sup> HSCs with MKs in BM.** (A and B) Representative image of a BM section from a C57BL/6J mouse showing pSHP-1<sup>+</sup> HSCs were surrounded by MKs. Dashed box indicates area of focus. Bars, 25 μm. (C) Quantification of distance between SHP-1<sup>+</sup> and SHP-1<sup>-</sup> HSCs with MKs in the BM (*n* = 311 HSCs from four mice. *P* = 0.01302 by KS test).
